# Supplementary material for: Characterization of the direct targets of FOXO transcription factors throughout evolution
Source: PubMed Central journal article supplement (PMC4933671; doi:10.1111/acel.12479), 2016-04-08

Figure S1

A

| Reference           | PMID     | Factor      | Species           | Cell type                                | Accession | Mapped Reads | Passed QC? |
|---------------------|----------|-------------|-------------------|------------------------------------------|-----------|--------------|------------|
| Webb et al.         | 23891001 | FOXO3       | Mouse             | Adult NPCs                               | GSE48336  | 12,702,983   | Yes        |
| Ochiai et al.       | 22267219 | FOXO1       | Mouse             | <i>IRF-4,8<sup>-/-</sup></i> pre-B cells | GSE35024  | 45,382,078   | Yes        |
| Kim et al.          | 23932570 | FOXO1       | Mouse             | CD8+ T-cells                             | GSE46944  | 9,949,662    | Yes        |
| Ouyang et al.       | 23135404 | FOXO1       | Mouse             | nTreg                                    | GSE40657  | 16,328,867   | Yes        |
| Litvak et al.       | 22982991 | FOXO3       | Mouse             | Unstimulated macrophages                 | GSE37052  | 5,694,391    | No         |
| Lin et al.          | 20543837 | FOXO1       | Mouse             | Rag1 KO pro-B cells                      | GSE21978  | 16,392,076   | No         |
| Riedel et al.       | 23604319 | DAF-16::GFP | <i>C. elegans</i> | Whole worm                               | GSE15567  | 19,379,002   | Yes        |
| modEncode           | -        | DAF-16::GFP | <i>C. elegans</i> | Whole worm                               | GSE15567  | 3,123,508    | Yes        |
| Bai et al.          | 24244197 | dFOXO       | <i>Drosophila</i> | <i>chico</i> heterozygotes               | GSE44686  | 35,627,907   | Yes        |
| Bai et al.          | 24244197 | dFOXO       | <i>Drosophila</i> | Adults with ablated IPCs                 | GSE44686  | 35,690,140   | Yes        |
| Eijkelenboom et al. | 24360957 | FOXO3-ER    | Human             | DLD1 cells                               | GSE35486  | 13,302,980   | No         |

B

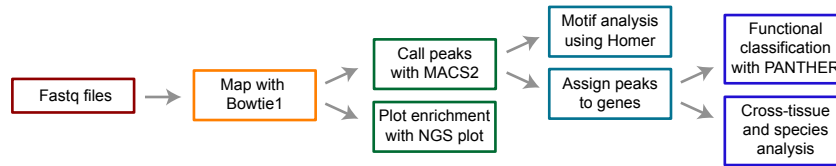

C

| Cell type                             | Factor      | MACS peaks | MACS q-value | Target genes | Motif | % Targets with motif | p-value                 |
|---------------------------------------|-------------|------------|--------------|--------------|-------|----------------------|-------------------------|
| NPCs                                  | FOXO3       | 22132      | 0.001        | 4278         |       | 36.12                | 1 x 10 <sup>-3101</sup> |
| CD8+ T-cells                          | FOXO1       | 8224       | 0.1          | 3162         |       | 31.34                | 1 x 10 <sup>-485</sup>  |
| pre-B cells                           | FOXO1       | 14020      | 0.001        | 1651         |       | 42.48                | 1 x 10 <sup>-1909</sup> |
| Treg cells                            | FOXO1       | 6209       | 0.1          | 2926         |       | 31.63                | 1 x 10 <sup>-404</sup>  |
| <i>C. elegans</i> Wild type           | DAF-16::GFP | 11711      | 0.001        | 7189         |       | 54.89                | 1 x 10 <sup>-611</sup>  |
| <i>C. elegans daf-2</i>               | DAF-16::GFP | 6434       | 0.1          | 4478         |       | 36.73                | 1 x 10 <sup>-194</sup>  |
| <i>Drosophila chico</i> heterozygotes | dFOXO       | 169        | 0.1          | 151          |       | 14.20                | 1 x 10 <sup>-18</sup>   |
| <i>Drosophila</i> IPC ablation        | dFOXO       | 203        | 0.1          | 251          |       | 46.31                | 1 x 10 <sup>-87</sup>   |
| Human DLD1 cells                      | FOXO3-ER    | 2850       | 0.01         | 3092         |       | 63.72                | 1 x 10 <sup>-480</sup>  |

Figure S2

A

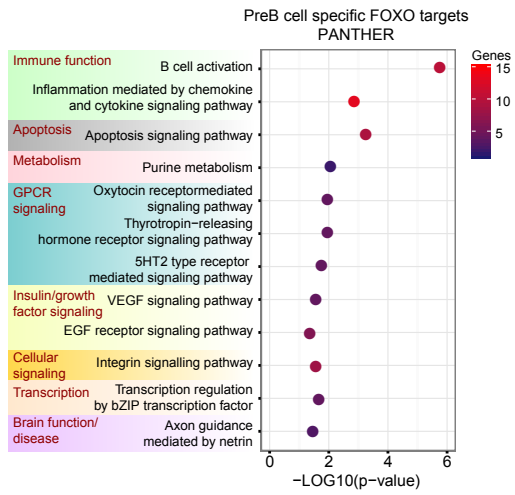

B

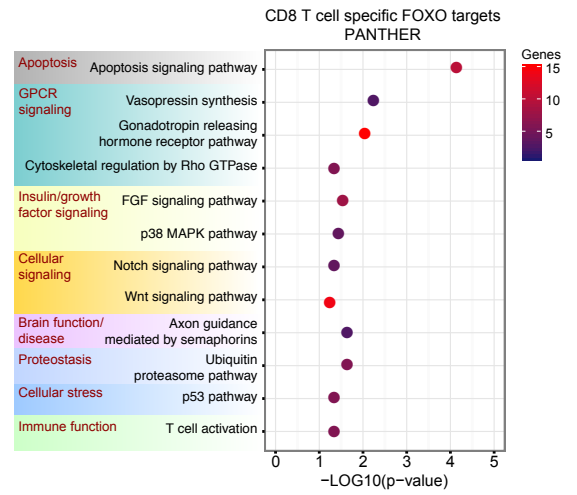

C

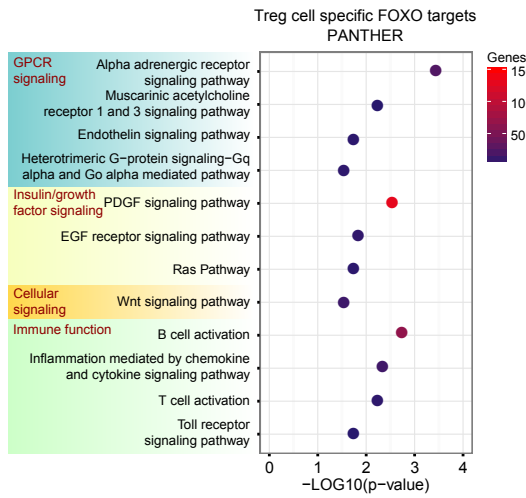

D

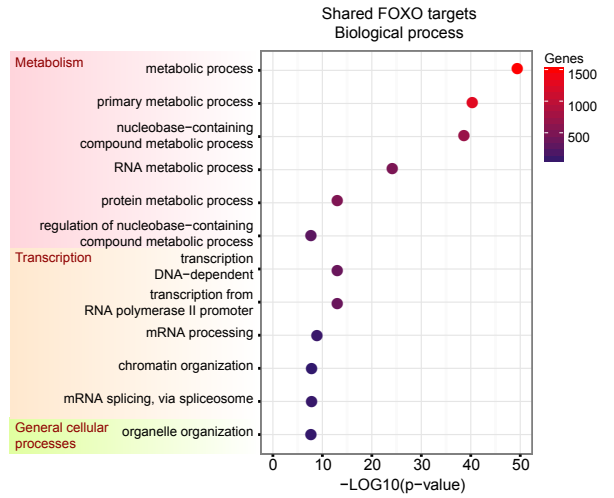

E

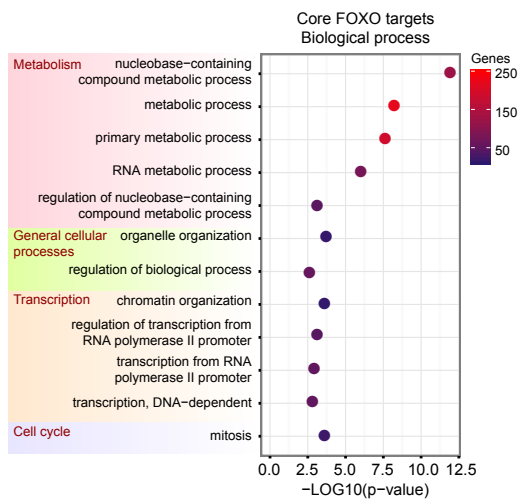

Figure S3

A

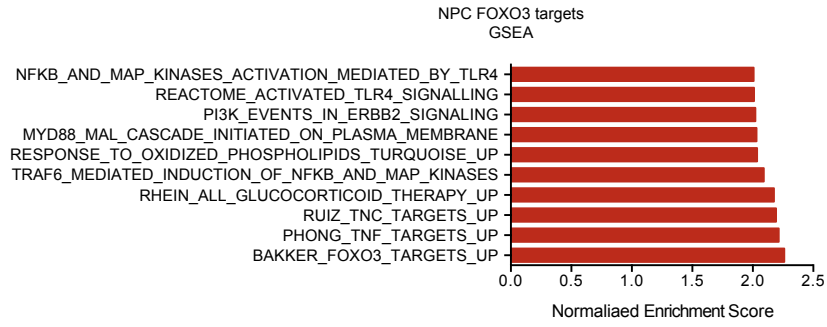

B

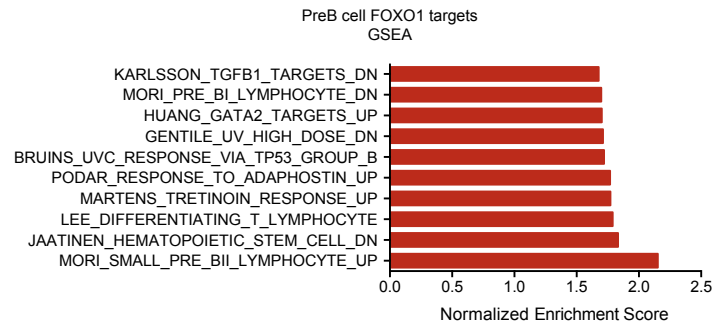

C

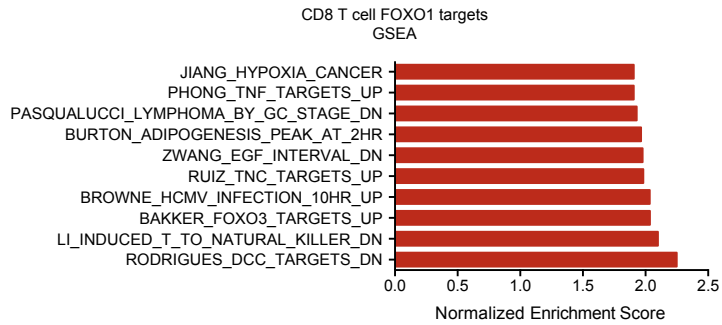

D

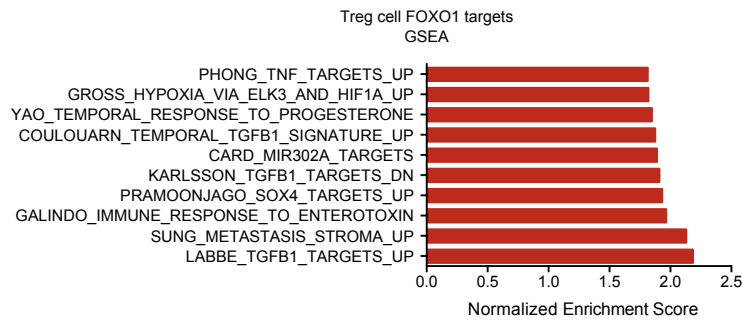

Figure S4

FOXO targets that functionally regulate aging

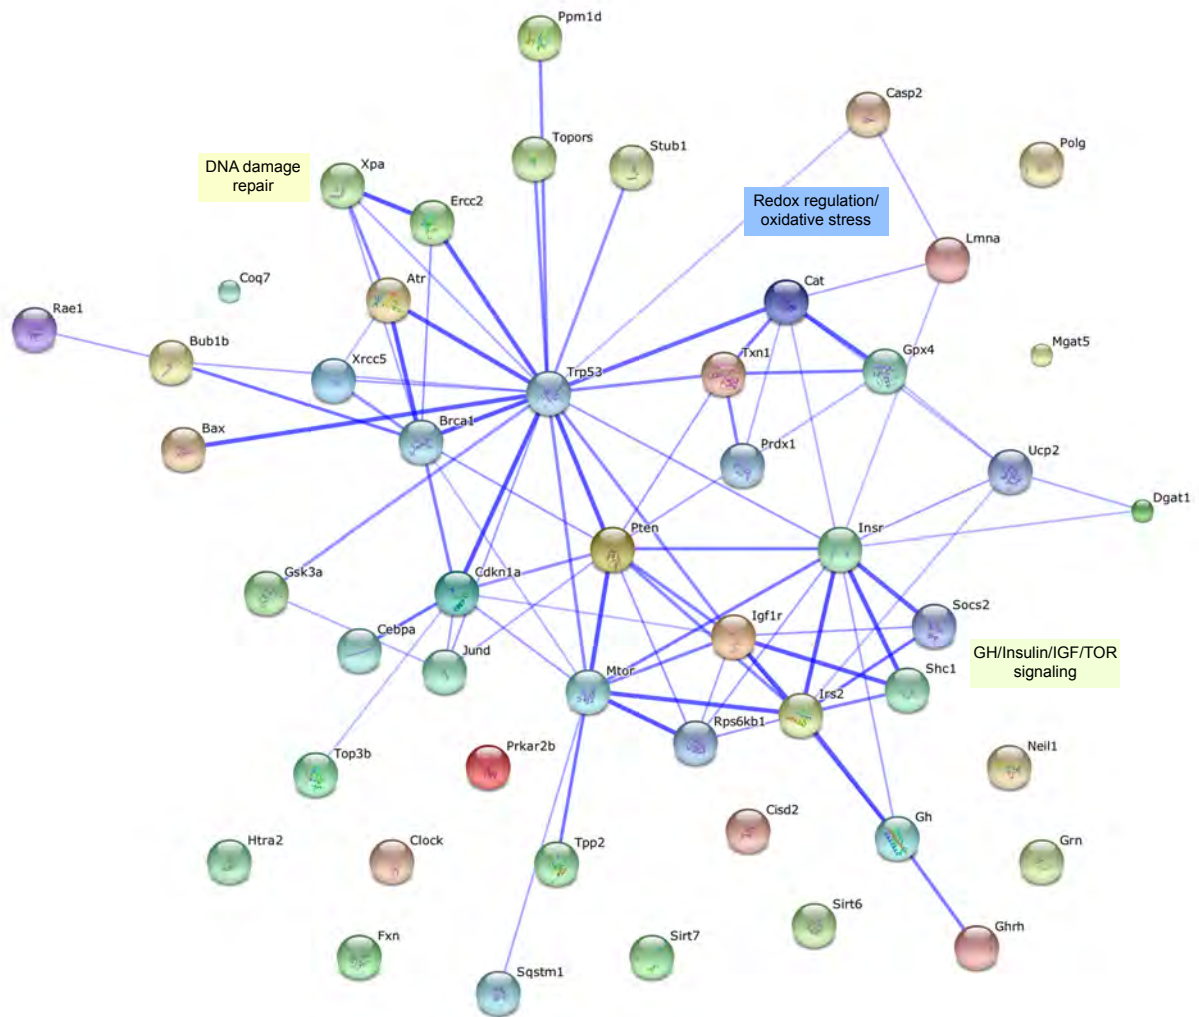

Figure S5

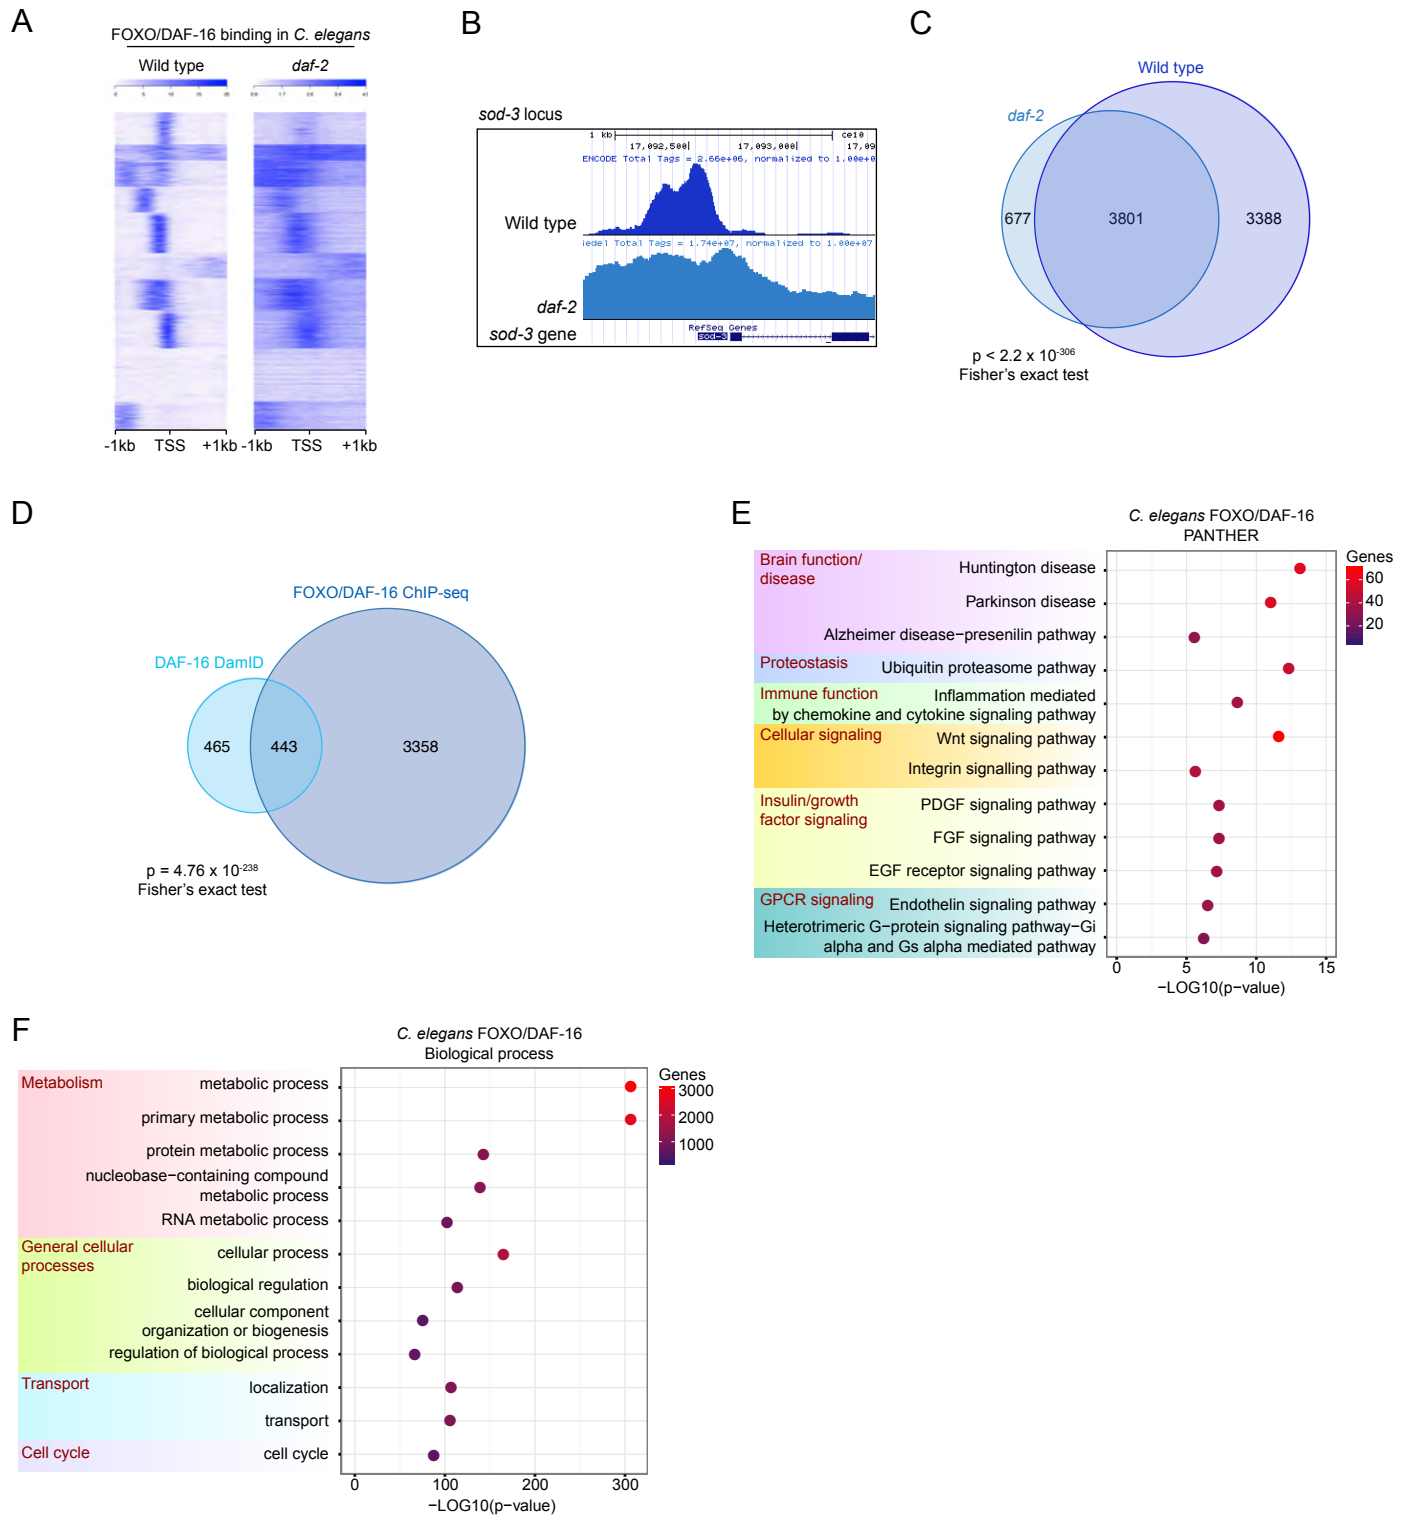

Figure S6

A

*C. elegans* FOXO/DAF-16 targets  
bound only in *daf-2* mutants  
PANTHER

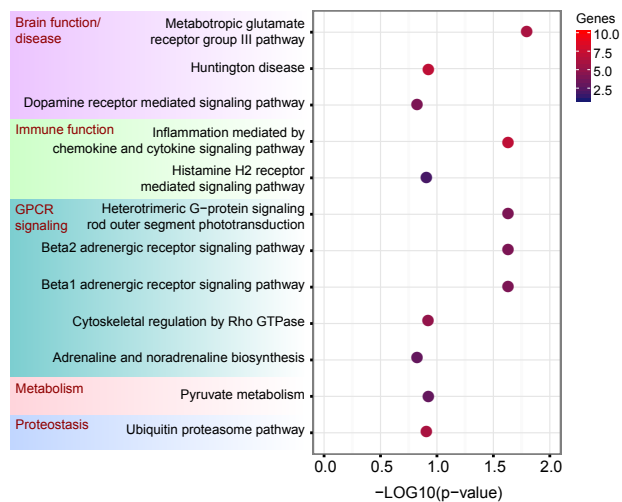

B

*C. elegans* FOXO/DAF-16 targets  
bound only in *daf-2* mutants  
Biological process

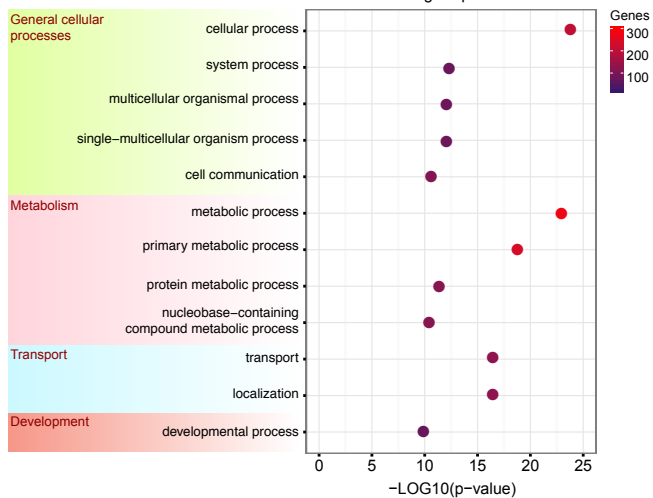

Figure S7

FOXO targets that functionally regulate aging in mouse

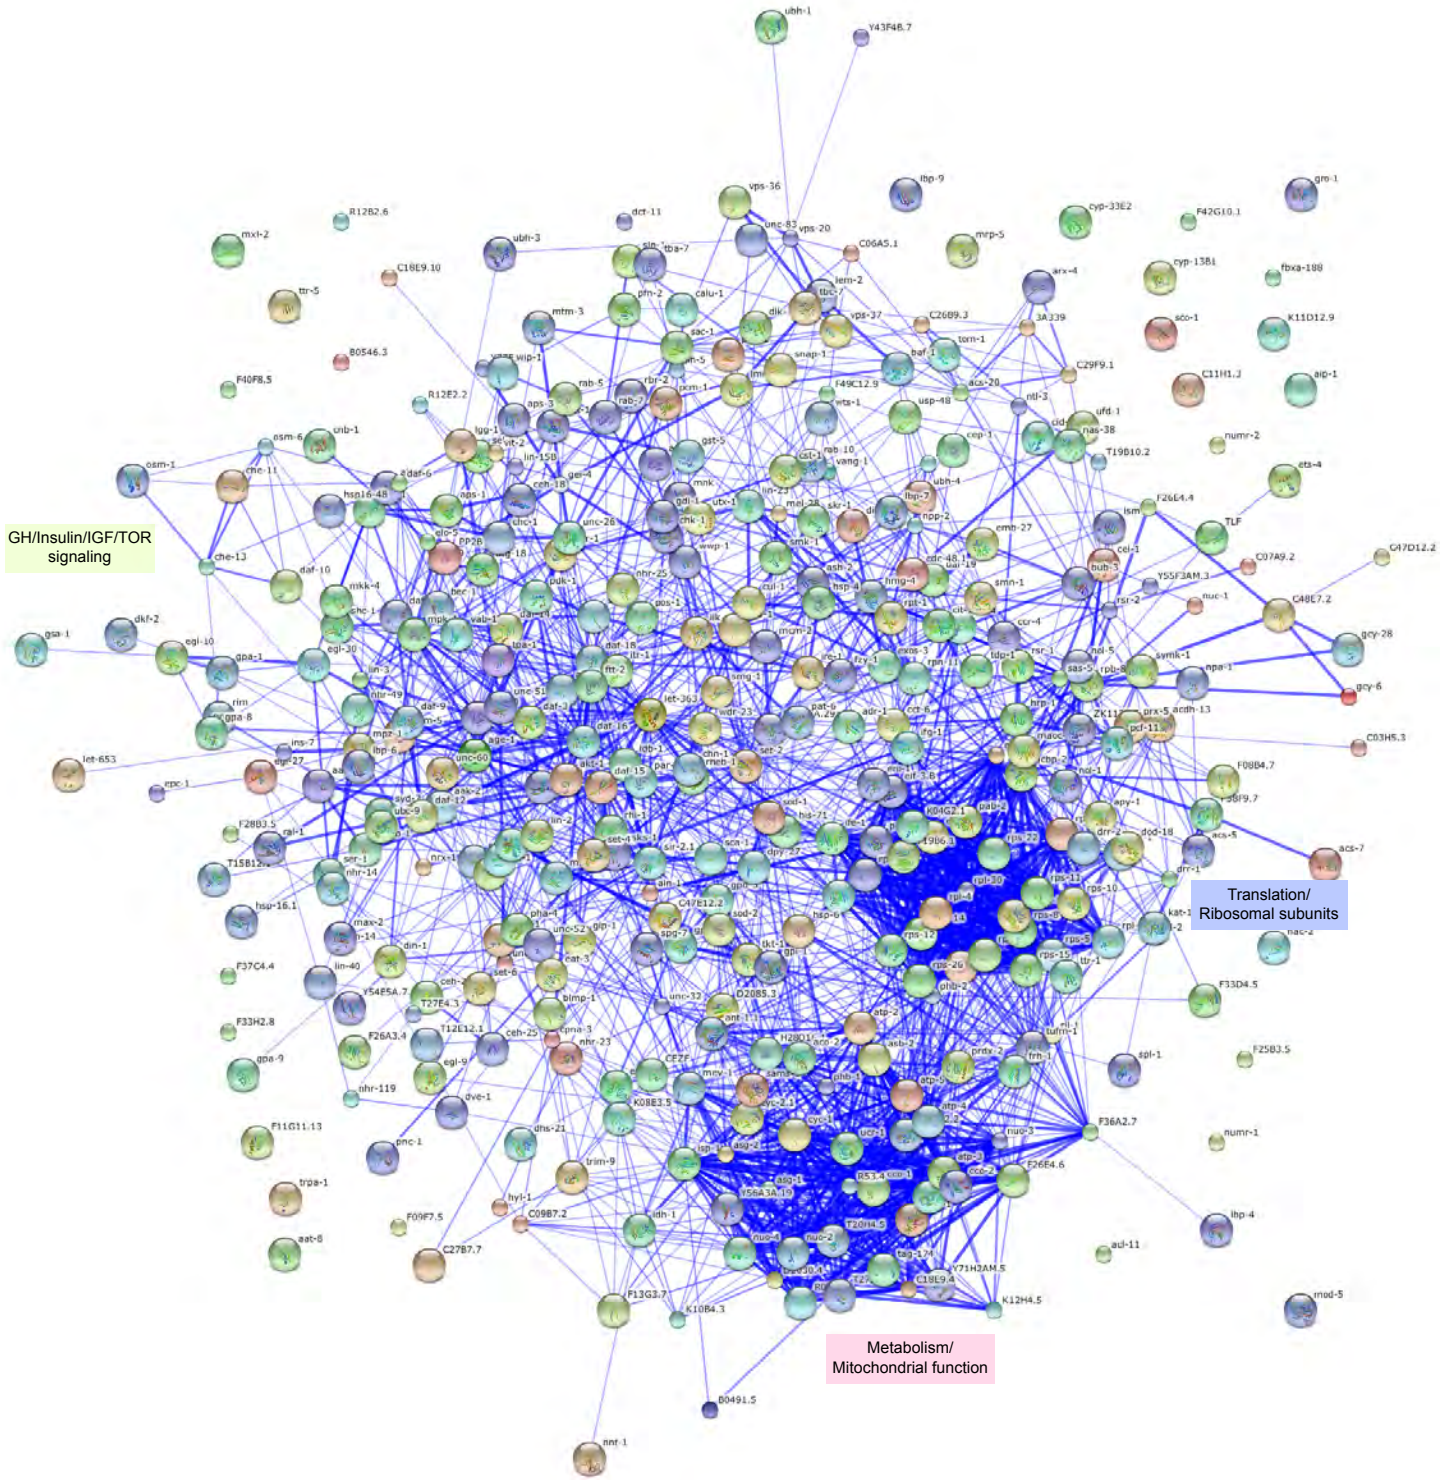

Figure S8

Conserved (mouse-worm) FOXO binding at functional aging regulators in *C. elegans*

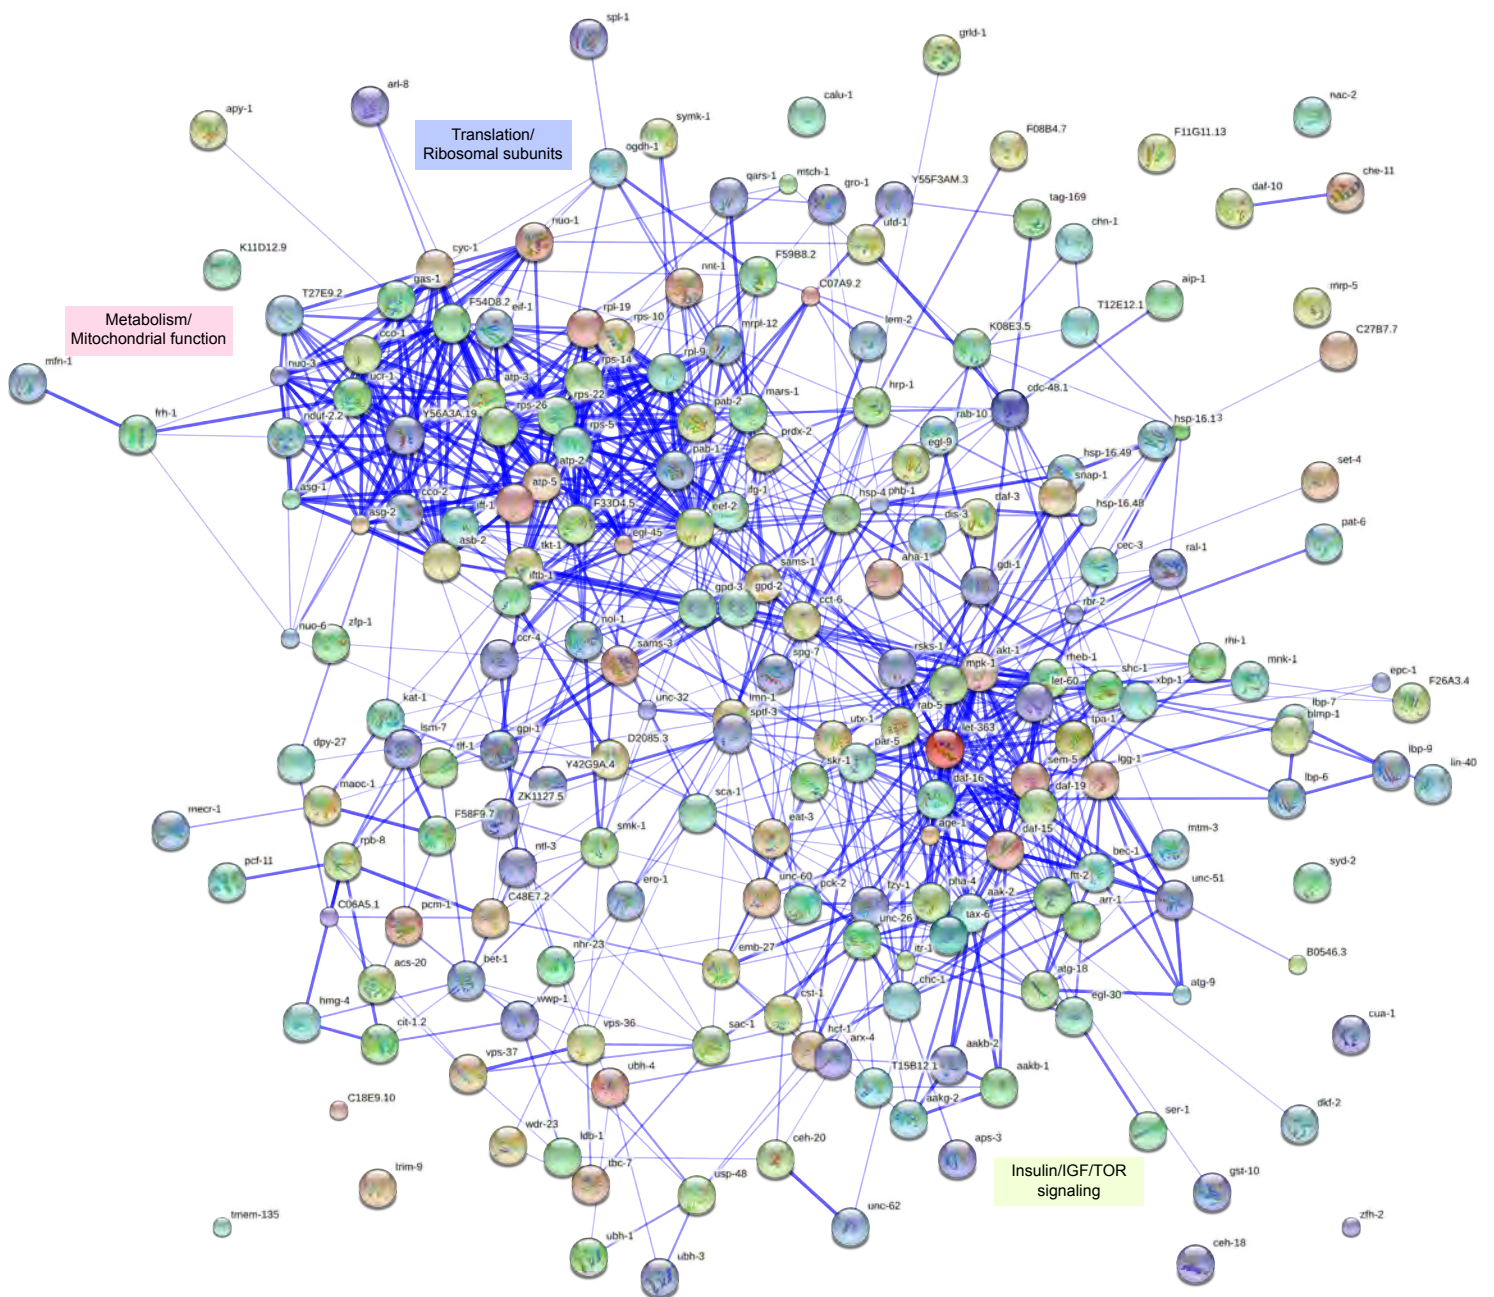



Figure S9

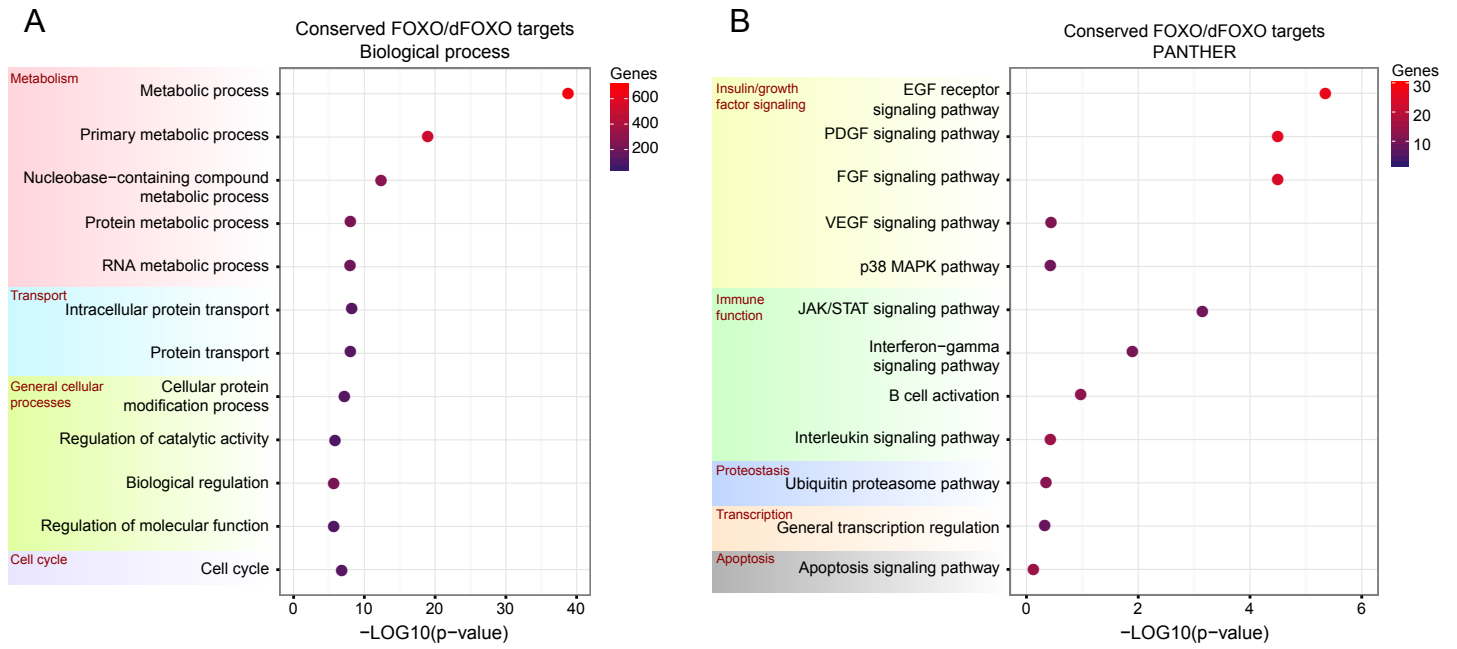

Figure S10

Network of FOXO/DAF-16  
target genes that change in expression with age in *C. elegans*

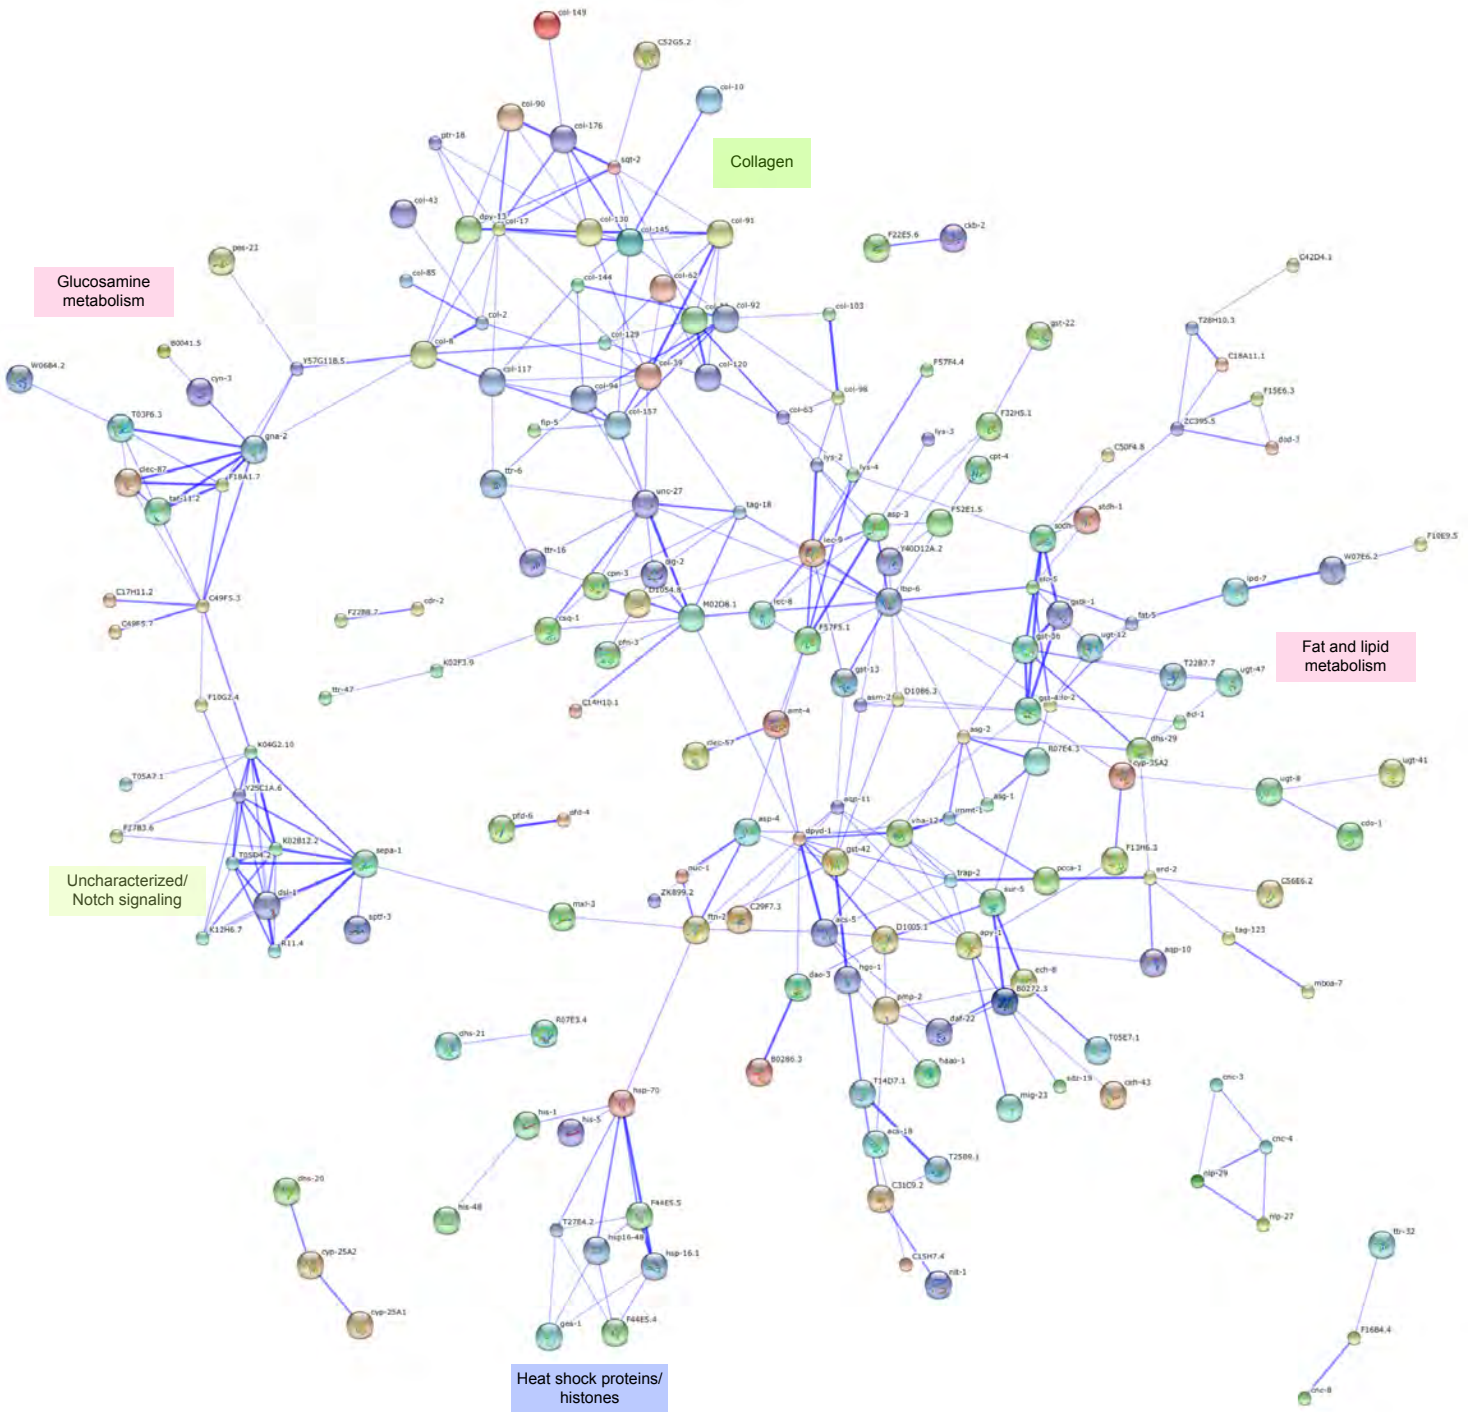

Supplement: ACEL-15-673-s001.pdf [file ACEL-15-673-s001.pdf]
